# Supplementary material for: Synthesis and reactions of the first fluoroalkylated Ni(ii) N-confused porphyrins
Source: Royal Society of Chemistry journal article supplement (doi:10.1039/b811831k), 2008-01-01

Electronic Supplementary Information

**Synthesis and Reactions of the First Fluoroalkylated Ni(II)**

**N-Confused Porphyrins**

Hua –Wei Jiang, <sup>a</sup> Qing –Yun Chen, <sup>a</sup> Ji –Chang Xiao\*<sup>a</sup> and Yu –Cheng Gu<sup>b</sup>

<sup>a</sup> Key Laboratory of Organofluorine Chemistry, Shanghai Institute of Organic Chemistry, Chinese Academy of Sciences, 354 Fenglin Road, Shanghai 200032, P. R. China. Fax: (+86) 21-64166128; E-mail: jchxiao@mail.sioc.ac.cn

<sup>b</sup> Syngenta, Jealott's Hill International Research Centre, Bracknell, Berkshire, RG42 6EY, UK

**Contents**

Page 2-9: Experimental details and characterization data for all new fluoroalkylate porphyrins

Page 10-21: Copies of <sup>1</sup>H and <sup>19</sup>F NMR spectra of new fluoroalkylated porphyrins

**General:**  $^1\text{H}$  (300MHz) and  $^{19}\text{F}$  (282MHz) NMR spectra were recorded with a Bruker AM-300 or Varian-VXR (300MHz) spectrometer. Chemical shifts are reported in parts per million (ppm) relative to TMS as an internal standard ( $\delta_{\text{TMS}} = 0$  ppm) for  $^1\text{H}$  NMR spectra and  $\text{CFCl}_3$  as an external standard (negative for upfield) for  $^{19}\text{F}$  NMR spectra. Deuterated solvents for NMR were purchased from Cambridge Isotope Laboratories, Aldrich or Acros. MS and HRMS were recorded on a Hewlett-Packard HP-5989A spectrometer and a Finnigan MAT-8483 mass spectrometer. UV/Vis spectra were measured with a Varian Cary 100 spectrophotometer. Elementary analyses were obtained on a Perkin Elmer 2400 Series  $\square$  Elemental Analyzer. TLC analysis were performed on silica gel plate and column chromatography over silica gel (mesh 300-400). Unless otherwise noted, reagents were commercial available and used as received. The solvent DMSO was treated with  $\text{CaH}_2$  and redistilled before using. The copper powder was prepared according the reported procedure (Liu, C.; Shen, D. –M.; Chen, Q. –Y. *Eur. J. Org. Chem.* 2006, 2703.). The starting N-confused porphyrins and Ni(II) N-Confused Porphyrins were synthesized according to the literatures (G. Richard Geier III, Denise M. Haynes, Jonathan S. Lindsey. 1999, **9**, 1455, and Chmielewski, P. J.; Latos-Grażyński, L.; Rachlewicz, K.; Głowiak, T. *Angew. Chem.* 1994, **104**, 805; *Angew. Chem. Int. Ed.* 1994, **33**, 779.).

**Typical procedure for synthesis of 21-fluoroalkylated N-confused porphyrins.** A mixture of **Ni1** (67 mg, 0.1 mmol),  $\text{Cl}(\text{CF}_2)_4\text{I}$  (1.087 g, 3 mmol) and copper powder (1.000 g, 22 mmol) was stirred in 20 mL DMSO at 100  $^\circ\text{C}$  for 40-60 min. The reaction course was monitored by TLC. When **Ni1** was totally consumed, the reaction mixture was filtered. Then  $\text{CH}_2\text{Cl}_2$  (100 ml) was added and washed several times with water. The organic layer was dried over anhydrous  $\text{Na}_2\text{SO}_4$  and evaporated by rotary vaporator to dryness. After chromatography on silica gel column using  $\text{CH}_2\text{Cl}_2$  as an eluent (the first band was collected) and crystallization from  $\text{CH}_2\text{Cl}_2/\text{EtOH}$ , a purple solid **Ni1b** was obtained.

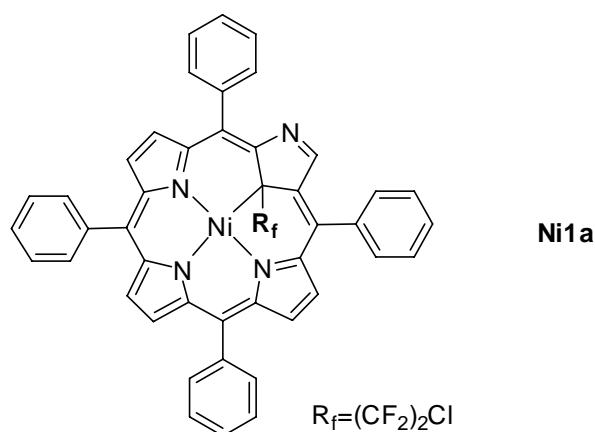

**Ni1a:** yield 37%.  $^1\text{H}$  NMR (300 MHz,  $\text{CDCl}_3$ ):  $\delta$  = 9.83 (s, 1H), 8.60 (d,  $J$  = 5.0 Hz, 1H), 8.58 (d,  $J$  = 5.0 Hz, 1H), 8.49 (d,  $J$  = 5.0 Hz, 2H), 8.45 (d,  $J$  = 4.9 Hz, 1H), 8.41 (d,  $J$  = 4.9 Hz, 1H), 7.62 ~ 8.18 (m, 20H).  $^{19}\text{F}$  NMR (282 MHz,  $\text{CDCl}_3$ ):  $\delta$  = -63.47, -65.77 (AB,  $J_{\text{AB}}$  = 169.1 Hz, 2F), -92.58 (m, 2F). UV/Vis ( $\text{CH}_2\text{Cl}_2$ ):  $\lambda_{\text{max}}$  (relative intensity) = 435 (35.4), 563 (sh), 607 (sh), 784 (1.0) nm. MS (MALDI):  $m/z$  804.1 ( $\text{M}^+$ ). Anal. Calcd for  $\text{C}_{46}\text{H}_{27}\text{ClF}_4\text{N}_4\text{Ni} \cdot 0.25\text{H}_2\text{O}$ : C, 68.18; H, 3.42; N, 6.91. Found: C, 68.13; H, 3.73; N, 6.55.

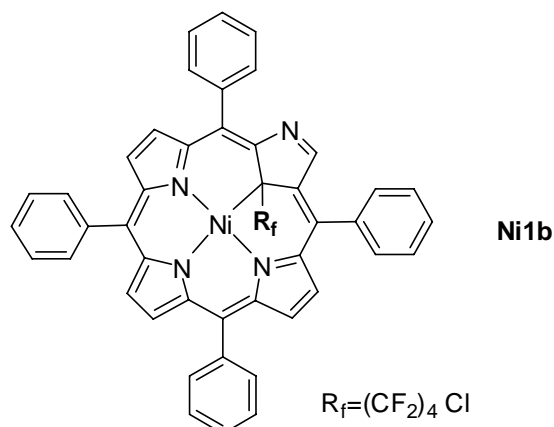

**Ni1b:** yield 88%.  $^1\text{H}$  NMR (300 MHz,  $\text{CDCl}_3$ ):  $\delta$  = 9.78 (s, 1H), 8.63 (d,  $J$  = 5.1 Hz, 1H), 8.60 (d,  $J$  = 5.1 Hz, 1H), 8.49 (d,  $J$  = 4.8 Hz, 2H), 8.45 (d,  $J$  = 4.9 Hz, 1H), 8.41 (d,  $J$  = 4.9 Hz, 1H), 7.62 ~ 8.18 (m, 20H).  $^{19}\text{F}$  NMR (282 MHz,  $\text{CDCl}_3$ ):  $\delta$  = -68.49 (m, 2F), -93.69, -96.07 (AB,  $J_{\text{AB}}$  = 269.8 Hz, 2F), -117.25 ~ -123.26 (m, 4F). UV/Vis ( $\text{CH}_2\text{Cl}_2$ ):  $\lambda_{\text{max}}$  (relative intensity) = 435 (40.2), 567 (sh), 610 (sh), 781 (1.0) nm. HRMS (MALDI): Calcd for  $\text{C}_{48}\text{H}_{27}\text{ClF}_8\text{N}_4\text{Ni}^+$ : 904.11500. Found: 904.11445. Anal. Calcd for  $\text{C}_{46}\text{H}_{27}\text{ClF}_4\text{N}_4\text{Ni} \cdot \text{CH}_2\text{Cl}_2 \cdot \text{H}_2\text{O}$ : C, 58.34; H, 3.10; N, 5.55. Found: C, 58.35; H, 3.02; N, 5.48.

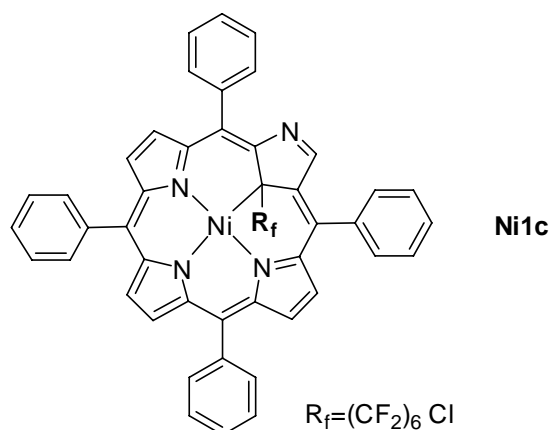

**Ni1c:** yield 78%.  $^1\text{H}$  NMR (300 MHz,  $\text{CDCl}_3$ ):  $\delta$  = 9.78 (s, 1H), 8.64 (d,  $J$  = 5.0 Hz, 1H), 8.61 (d,  $J$  = 5.0 Hz, 1H), 8.50 (d,  $J$  = 4.7 Hz, 2H), 8.46 (d,  $J$  = 4.9 Hz, 1H), 8.42 (d,  $J$  = 4.9 Hz, 1H), 7.62 ~ 8.18 (m, 20H).  $^{19}\text{F}$  NMR (282 MHz,  $\text{CDCl}_3$ ):  $\delta$  = -68.17 (m, 2F), -93.11, -95.45 (AB,  $J_{\text{AB}}$  = 261.3 Hz, 2F), -117.37 ~ -122.50 (m, 8F). UV/Vis ( $\text{CH}_2\text{Cl}_2$ ):  $\lambda_{\text{max}}$  (relative intensity) = 435 (40.2), 562 (sh), 612 (sh), 783 (1.0) nm. MS (MALDI):  $m/z$  1004.1 ( $\text{M}^+$ ). Anal. Calcd for  $\text{C}_{50}\text{H}_{27}\text{ClF}_{12}\text{N}_4\text{Ni} \cdot \text{H}_2\text{O}$ : C, 58.65; H, 2.85; N, 5.47. Found: C, 58.49; H, 2.86; N, 5.07.

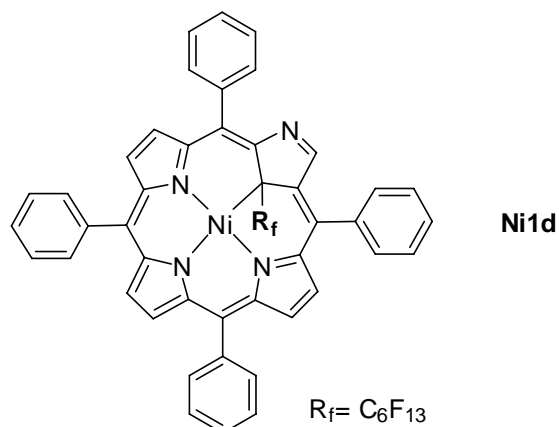

**Ni1d**: yield 78%.  $^1H$  NMR (300 MHz,  $CDCl_3$ ):  $\delta$  = 9.77 (s, 1H), 8.63 (d,  $J$  = 5.0 Hz, 1H), 8.61 (d,  $J$  = 5.0 Hz, 1H), 8.50 (d,  $J$  = 5.0 Hz, 2H), 8.46 (d,  $J$  = 5.0 Hz, 1H), 8.42 (d,  $J$  = 5.0 Hz, 1H), 7.62 ~ 8.18 (m, 20H).  $^{19}F$  NMR (282 MHz,  $CDCl_3$ ):  $\delta$  = -80.56 (m, 3F), -92.78, -95.21 (AB,  $J_{AB}$  = 279.3 Hz, 2F), -117.71 ~ -123.20 (m, 8F). UV/Vis ( $CH_2Cl_2$ ):  $\lambda_{max}$  (relative intensity) = 436 (35.0), 563 (sh), 611 (sh), 779 (1.0) nm. MS (MALDI):  $m/z$  988.1 ( $M^+$ ). Anal. Calcd for  $C_{50}H_{27}F_{13}N_4Ni \cdot CH_3CH_2OH$ : C, 60.31; H, 3.21; N, 5.41. Found: C, 60.39; H, 3.49; N, 4.93.

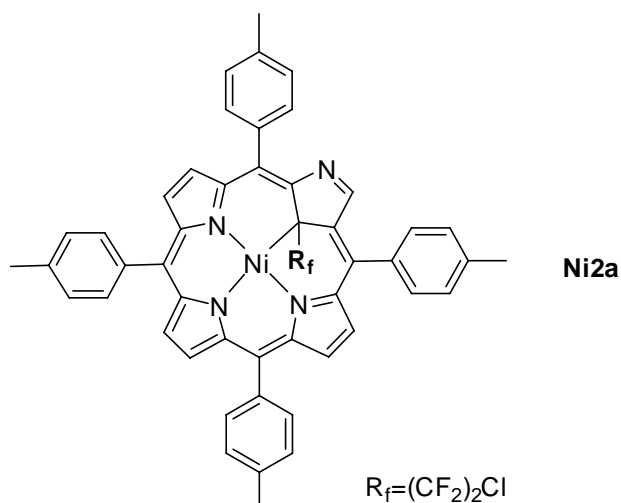

**Ni2a**: yield 32%.  $^1H$  NMR (300 MHz,  $CDCl_3$ ):  $\delta$  = 9.79 (s, 1H), 8.57 ~ 8.62 (m, 2H), 8.49 (d,  $J$  = 5.0 Hz, 2H), 8.46 (d,  $J$  = 5.0 Hz, 1H), 8.41 (d,  $J$  = 5.0 Hz, 1H), 7.45 ~ 8.08 (m, 16H), 2.56 ~ 2.67 (m, 12H).  $^{19}F$  NMR (282 MHz,  $CDCl_3$ ):  $\delta$  = -63.72, -65.78 (AB,  $J_{AB}$  = 168.3 Hz, 2F), -92.51 (m, 2F). UV/Vis ( $CH_2Cl_2$ ):  $\lambda_{max}$  (relative intensity) = 438 (33.4), 567 (sh), 609 (sh), 790 (1.0) nm. MS (MALDI):  $m/z$  860.2 ( $M^+$ ). Anal. Calcd for  $C_{50}H_{35}ClF_4N_4Ni \cdot H_2O$ : C, 68.24; H, 4.24; N, 6.37. Found: C, 68.40; H, 3.95; N, 6.62.

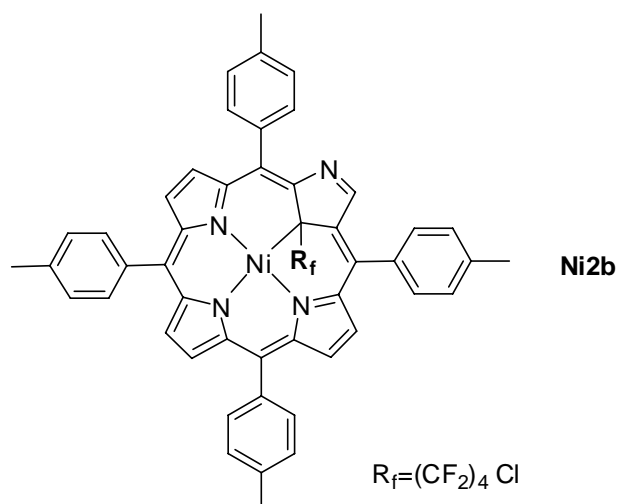

**Ni2b:** yield 92%.  $^1H$  NMR (300 MHz,  $CDCl_3$ ):  $\delta$  = 9.72 (s, 1H), 8.57 ~ 8.64 (m, 2H), 8.49 (d,  $J$  = 5.0 Hz, 2H), 8.45 (d,  $J$  = 4.8 Hz, 1H), 8.41 (d,  $J$  = 4.8 Hz, 1H), 7.42 ~ 8.07 (m, 16H), 2.58 ~ 2.69 (m, 12H).  $^{19}F$  NMR (282 MHz,  $CDCl_3$ ):  $\delta$  = -68.38 (m, 2F), -93.65, -96.02 (AB,  $J_{AB}$  = 269.5 Hz, 2F), -117.90 ~ -123.24 (m, 4F). UV/Vis ( $CH_2Cl_2$ ):  $\lambda_{max}$  (relative intensity) = 439 (31.5), 567 (sh), 612 (sh), 779 (1.0) nm. MS (MALDI):  $m/z$  960.2 ( $M^+$ ). Anal. Calcd for  $C_{52}H_{35}ClF_8N_4Ni \cdot 1.5CH_2Cl_2$ : C, 58.98; H, 3.52; N, 5.14. Found: C, 58.85; H, 3.21; N, 5.22.

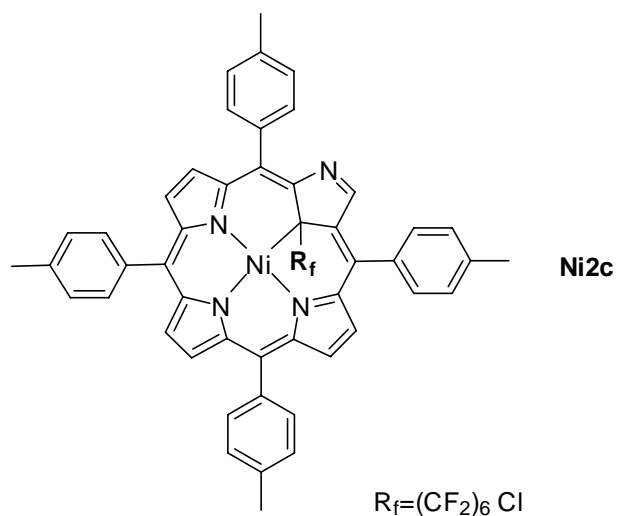

**Ni2c:** yield 91%.  $^1H$  NMR (300 MHz,  $CDCl_3$ ):  $\delta$  = 9.73 (s, 1H), 8.58 ~ 8.64 (m, 2H), 8.50 (d,  $J$  = 5.0 Hz, 2H), 8.46 (d,  $J$  = 4.8 Hz, 1H), 8.42 (d,  $J$  = 4.8 Hz, 1H), 7.40 ~ 8.07 (m, 16H), 2.53 ~ 2.69 (m, 12H).  $^{19}F$  NMR (282 MHz,  $CDCl_3$ ):  $\delta$  = -68.51 (m, 2F), -93.69, -96.13 (AB,  $J_{AB}$  = 268.9 Hz, 2F), -117.74 ~ -123.61 (m, 8F). UV/Vis ( $CH_2Cl_2$ ):  $\lambda_{max}$  (relative intensity) = 439 (33.2), 568 (sh), 610 (sh), 779 (1.0) nm. MS (MALDI):  $m/z$  1060.2 ( $M^+$ ). Anal. Calcd for  $C_{54}H_{35}ClF_{12}N_4Ni \cdot CH_2Cl_2 \cdot CH_3CH_2OH \cdot 0.5H_2O$ : C, 56.96; H, 3.69; N, 4.66. Found: C, 57.25; H, 3.94; N, 4.26.

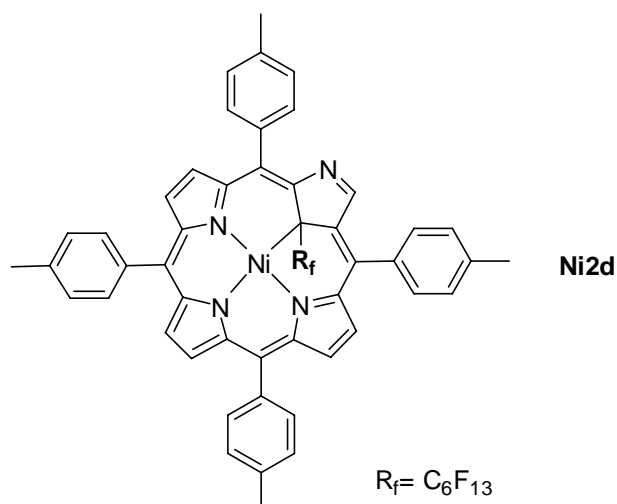

**Ni2d**: yield 90%.  $^1H$  NMR (300 MHz,  $CDCl_3$ ):  $\delta$  = 9.71 (s, 1H), 8.57 ~ 8.66 (m, 2H), 8.49 (d,  $J$  = 4.8 Hz, 2H), 8.45 (d,  $J$  = 4.9 Hz, 1H), 8.41 (d,  $J$  = 4.9 Hz, 1H), 7.37 ~ 8.00 (m, 16H), 2.57 ~ 2.72 (m, 12H).  $^{19}F$  NMR (282 MHz,  $CDCl_3$ ):  $\delta$  = -80.51 (m, 3F), -92.79, -95.15 (AB,  $J_{AB}$  = 280.3 Hz, 2F), -117.74 ~ -123.17 (m, 8F). UV/Vis ( $CH_2Cl_2$ ):  $\lambda_{max}$  (relative intensity) = 439 (33.5), 565 (sh), 612 (sh), 788 (1.0) nm. MS (MALDI):  $m/z$  1044.2 ( $M^+$ ). Anal. Calcd for  $C_{54}H_{35}F_{13}N_4Ni$ : C, 62.03; H, 3.37; N, 5.36. Found: C, 61.60; H, 3.65; N, 4.88.

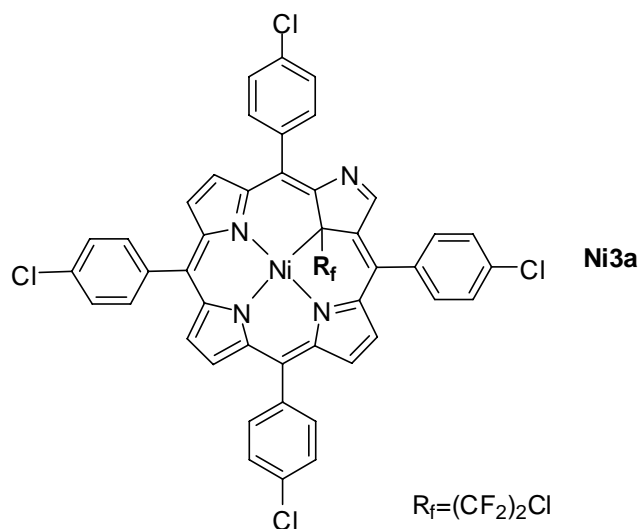

**Ni3a**: yield 33%.  $^1H$  NMR (300 MHz,  $CDCl_3$ ):  $\delta$  = 9.83 (s, 1H), 8.60 (d,  $J$  = 5.0 Hz, 1H), 8.58 (d,  $J$  = 5.0 Hz, 1H), 8.49 (d,  $J$  = 5.0 Hz, 2H), 8.45 (d,  $J$  = 4.9 Hz, 1H), 8.41 (d,  $J$  = 4.9 Hz, 1H), 7.63 ~ 8.18 (m, 16H).  $^{19}F$  NMR (282 MHz,  $CDCl_3$ ):  $\delta$  = -63.72, -65.77 (AB,  $J_{AB}$  = 167.8 Hz, 2F), -92.58 (m, 2F). UV/Vis ( $CH_2Cl_2$ ):  $\lambda_{max}$  (relative intensity) = 439 (32.7), 567 (sh), 611 (sh), 767 (1.0) nm. MS (MALDI):  $m/z$  940.0 ( $M^+$ ). Anal. Calcd for  $C_{46}H_{23}Cl_5F_4N_4Ni \cdot 2.25CH_2Cl_2 \cdot 0.5CH_3CH_2OH$ : C, 51.09; H, 2.66; N, 4.84. Found: C, 51.33; H, 2.24; N, 4.36.

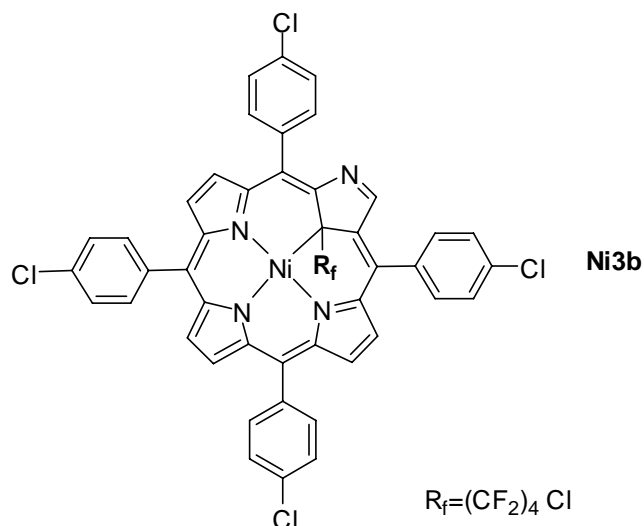

**Ni3b**: yield 62%.  $^1H$  NMR (300 MHz,  $CDCl_3$ ):  $\delta$  = 9.74 (s, 1H), 8.50 ~ 8.56 (m, 2H), 8.49 (d,  $J$  = 5.0 Hz, 2H), 8.46 (d,  $J$  = 5.0 Hz, 1H), 8.42 (d,  $J$  = 5.0 Hz, 1H), 7.55 ~ 8.07 (m, 16H).  $^{19}F$  NMR (282 MHz,  $CDCl_3$ ):  $\delta$  = -68.05 (m, 2F), -93.49, -95.50 (AB,  $J_{AB}$  = 292.3 Hz, 2F), -117.81 ~ -122.21 (m, 4F). UV/Vis ( $CH_2Cl_2$ ):  $\lambda_{max}$  (relative intensity) = 442 (35.1), 567 (sh), 612 (sh), 782 (1.0) nm. MS (MALDI):  $m/z$  1040.0 ( $M^+$ ). Anal. Calcd for  $C_{48}H_{23}Cl_5F_8N_4Ni \cdot CH_2Cl_2 \cdot H_2O$ : C, 51.33; H, 2.37; N, 4.89. Found: C, 51.41; H, 2.62; N, 4.69.

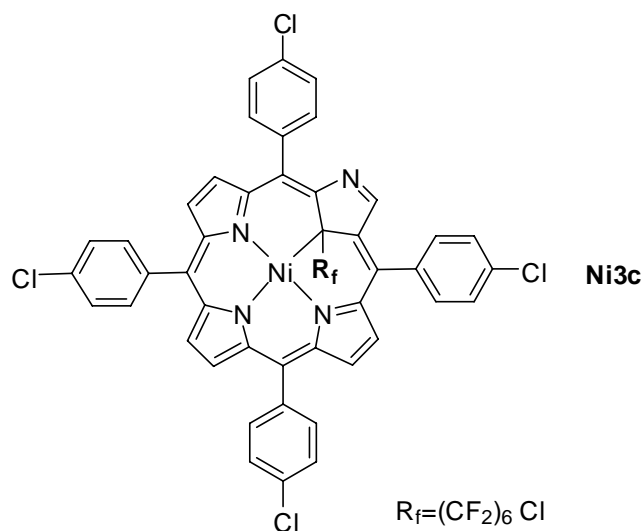

**Ni3c**: yield 56%.  $^1H$  NMR (300 MHz,  $CDCl_3$ ):  $\delta$  = 9.76 (s, 1H), 8.57 ~ 8.64 (m, 2H), 8.50 (d,  $J$  = 5.0 Hz, 2H), 8.47 (d,  $J$  = 4.8 Hz, 1H), 8.43 (d,  $J$  = 4.8 Hz, 1H), 7.58 ~ 8.17 (m, 16H).  $^{19}F$  NMR (282 MHz,  $CDCl_3$ ):  $\delta$  = -68.20 (m, 2F), -93.10, -95.47 (AB,  $J_{AB}$  = 263.5 Hz, 2F), -117.24 ~ -122.45 (m, 8F). UV/Vis ( $CH_2Cl_2$ ):  $\lambda_{max}$  (relative intensity) = 441 (33.2), 575 (sh), 613 (sh), 780 (1.0) nm. MS (MALDI):  $m/z$  1140.0 ( $M^+$ ). Anal. Calcd for  $C_{50}H_{23}Cl_5F_{12}N_4Ni \cdot 0.5CH_2Cl_2 \cdot CH_3CH_2OH$ : C, 51.17; H, 2.45; N, 4.55. Found: C, 51.29; H, 2.19; N, 4.20.

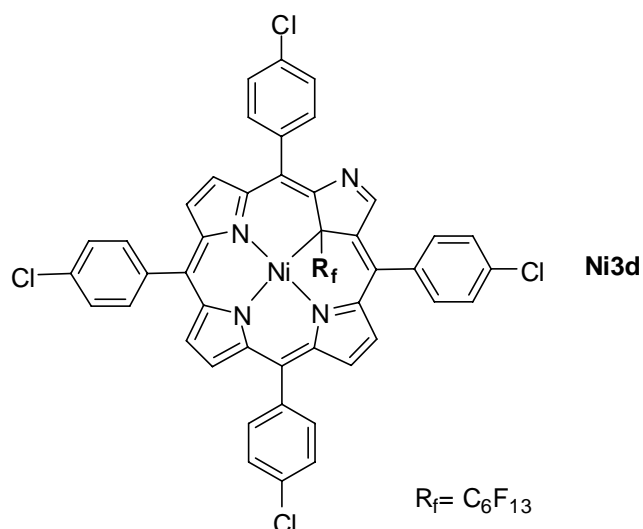

**Ni3d**: yield 58%.  $^1H$  NMR (300 MHz,  $CDCl_3$ ):  $\delta$  = 9.72 (s, 1H), 8.56 ~ 8.64 (m, 2H), 8.49 (d,  $J$  = 5.0 Hz, 2H), 8.46 (d,  $J$  = 5.0 Hz, 1H), 8.42 (d,  $J$  = 5.0 Hz, 1H), 7.61 ~ 8.15 (m, 16H).  $^{19}F$  NMR (282 MHz,  $CDCl_3$ ):  $\delta$  = -81.36 (m, 3F), -93.77, -95.90 (AB,  $J_{AB}$  = 265.6 Hz, 2F), -117.65 ~ -127.18 (m, 8F). UV/Vis ( $CH_2Cl_2$ ):  $\lambda_{max}$  (relative intensity) = 441 (35.1), 574 (sh), 617 (sh), 781 (1.0) nm. MS (MALDI):  $m/z$  1124.0 ( $M^+$ ). Anal. Calcd for  $C_{50}H_{23}Cl_4F_{13}N_4Ni \cdot CH_2Cl_2 \cdot 2CH_3CH_2OH \cdot H_2O$ : C, 49.96; H, 2.97; N, 4.24. Found: C, 50.22; H, 2.68; N, 3.77.

**Typical Procedure for the Synthesis of 2-Aza-2-CH<sub>3</sub>-21-fluoroalkyl-5,10,15,20-tetra-aryl-21-carbaporphyrinatonickel(II) Iodide. Ni1d** (20 mg, 0.029 mmol) and methyl iodide (5mL, 98.6 mmol) were dissolved in 20 mL of dichloromethane and stirred under reflux for 24 h. The reaction mixture was evaporated by rotary vaporator to dryness and dissolved in dichloromethane again. Precipitation with *n*-hexane gave the methylated product **Ni1da**.

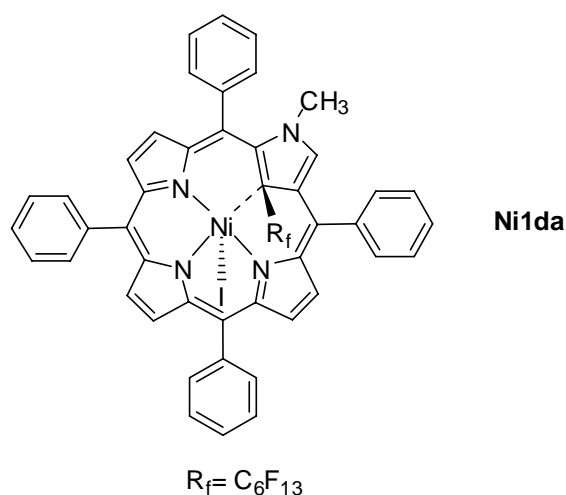

**Ni1da**: yield 75%. UV/Vis ( $CH_2Cl_2$ ):  $\lambda_{max}$  (relative intensity) = 455 (32.2), 501 (sh), 684 (sh), 750 (1.0) nm. MS (MALDI):  $m/z$ , 1003.2 ( $[M-I]^+$ ). Anal. Calcd for  $C_{51}H_{30}F_{13}N_4Ni \cdot 3H_2O$ : C, 51.67; H, 3.06; N, 4.73. Found: C, 51.29; H, 3.28; N, 4.50.



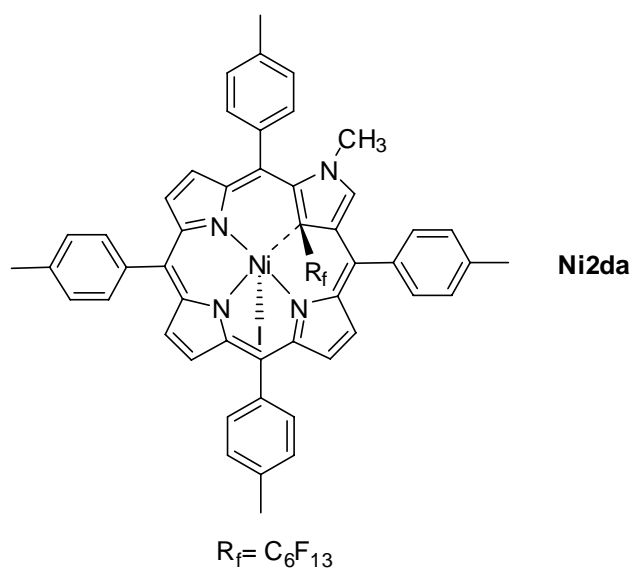

**Ni2da:** yield 73%. UV/Vis ( $CH_2Cl_2$ ):  $\lambda_{max}$  (relative intensity) = 453 (35.0), 502 (sh), 687 (sh), 756 (1.0) nm. MS (MALDI):  $m/z$  1059.2 ( $[M-I]^+$ ). Anal. Calcd for  $C_{55}H_{38}F_{13}IN_4Ni \cdot C_6H_{14} \cdot 2.5H_2O$ : C, 55.56; H, 4.36; N, 4.25. Found: C, 55.23; H, 4.56; N, 3.95.

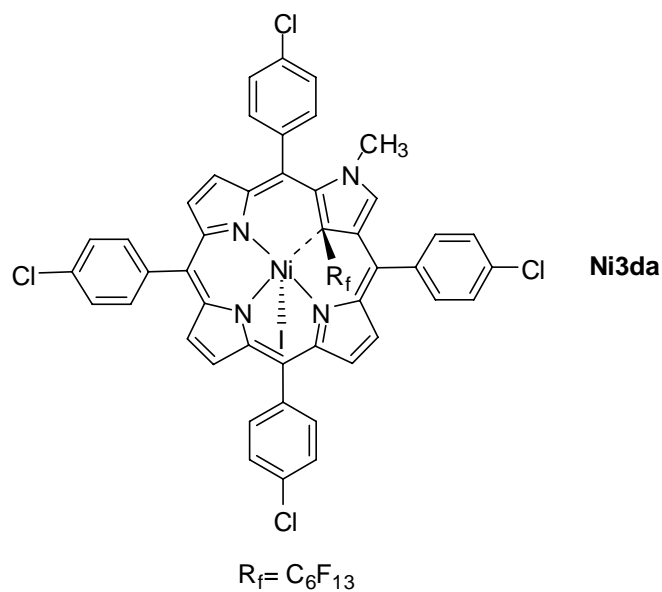

**Ni3da:** yield 78%. UV/Vis ( $CH_2Cl_2$ ):  $\lambda_{max}$  (relative intensity) = 451 (32.3), 501 (sh), 683 (sh), 752 (1.0) nm. MS (MALDI):  $m/z$  1139.0 ( $[M-I]^+$ ). Anal. Calcd for  $C_{51}H_{26}Cl_4F_{13}IN_4Ni \cdot C_6H_{14} \cdot H_2O$ : C, 49.85; H, 3.08; N, 4.08. Found: C, 49.70; H, 3.19; N, 3.90.

Copies of  $^1\text{H}$  and  $^{19}\text{F}$  NMR spectra of new fluoroalkylated porphyrins:

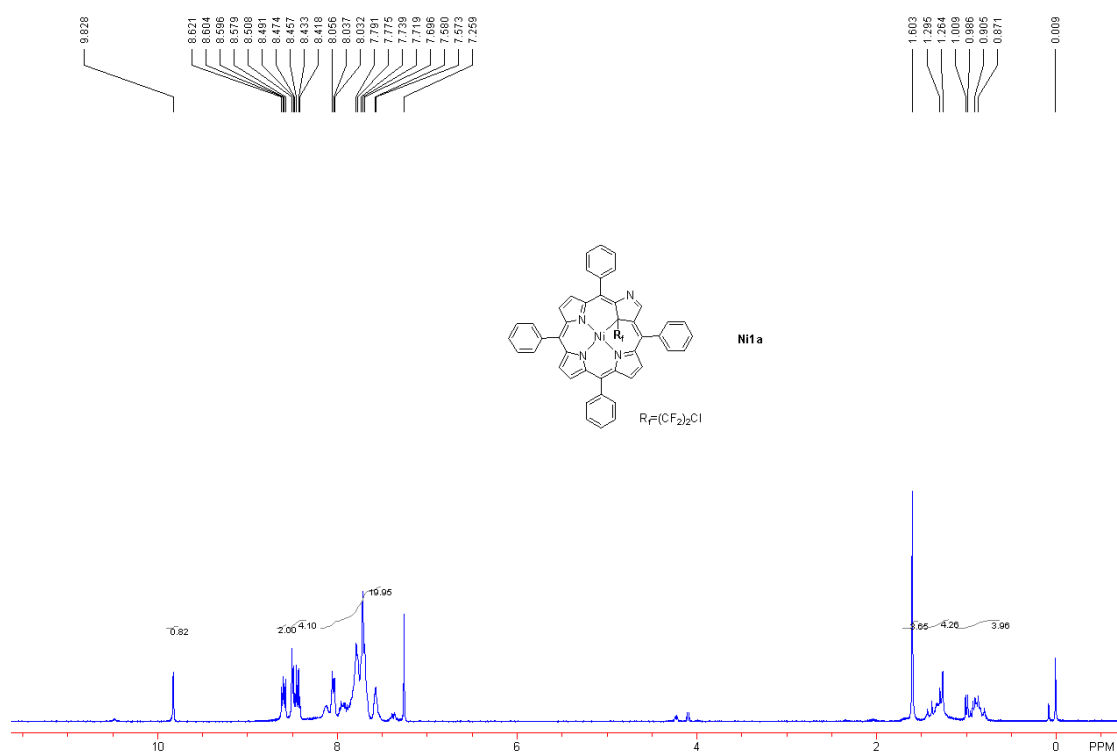

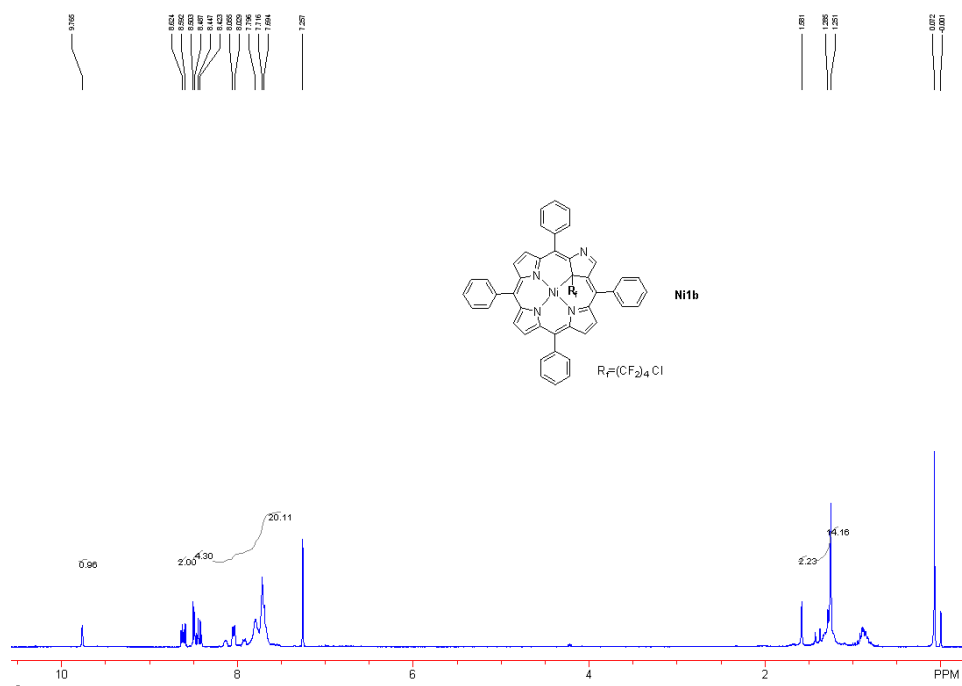<sup>19</sup>F NMR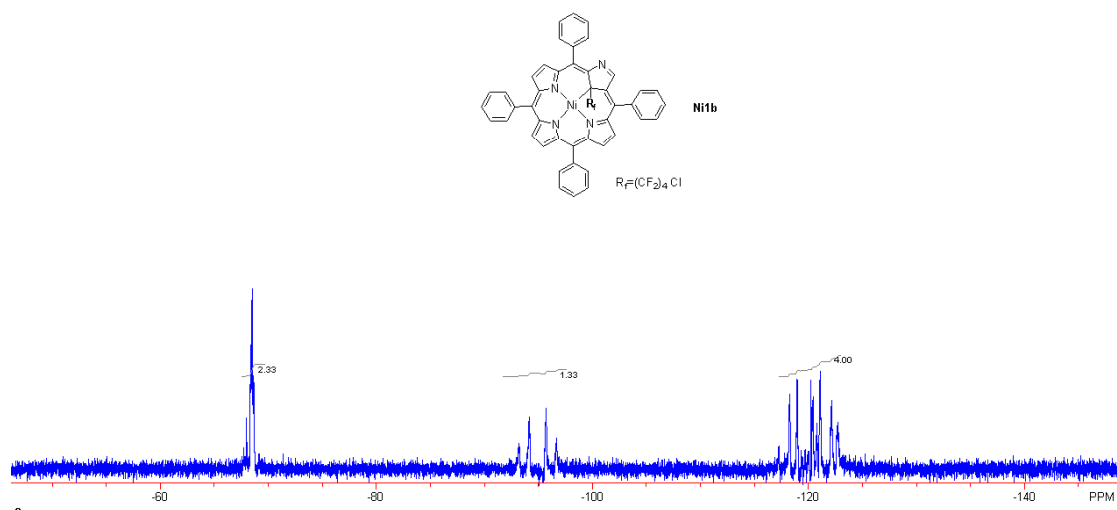

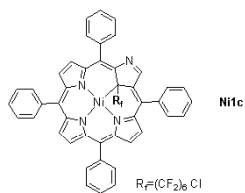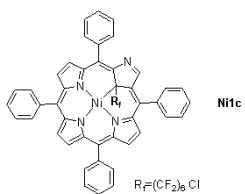

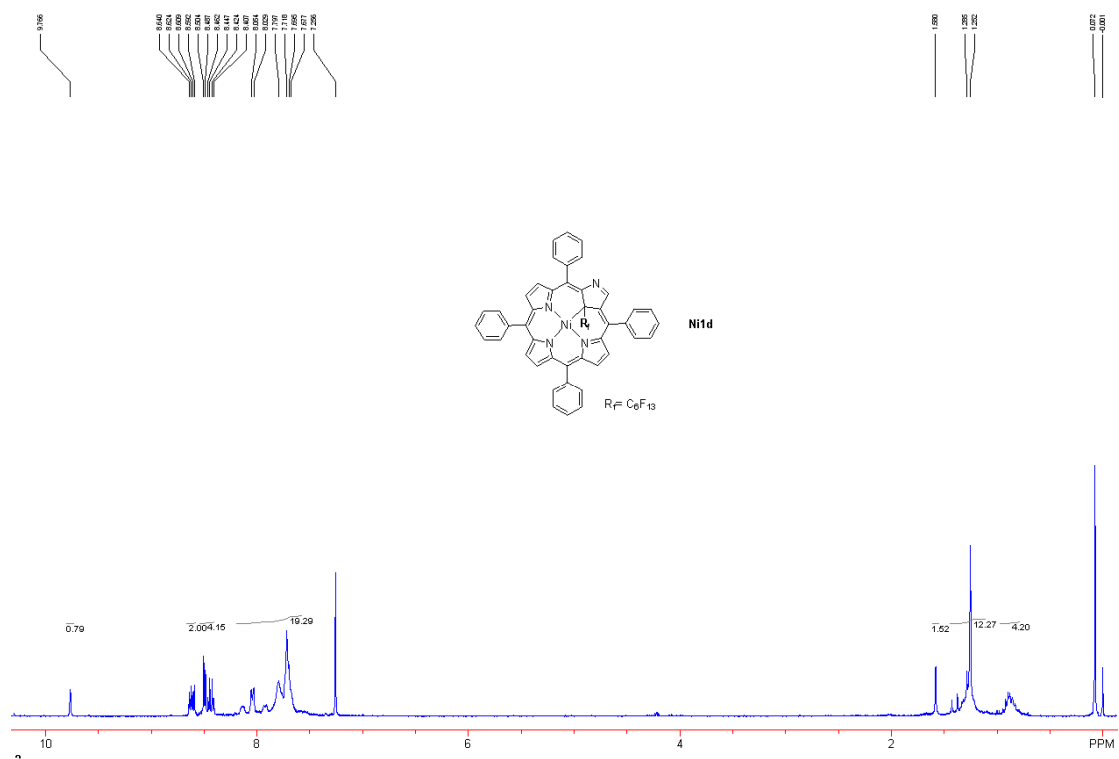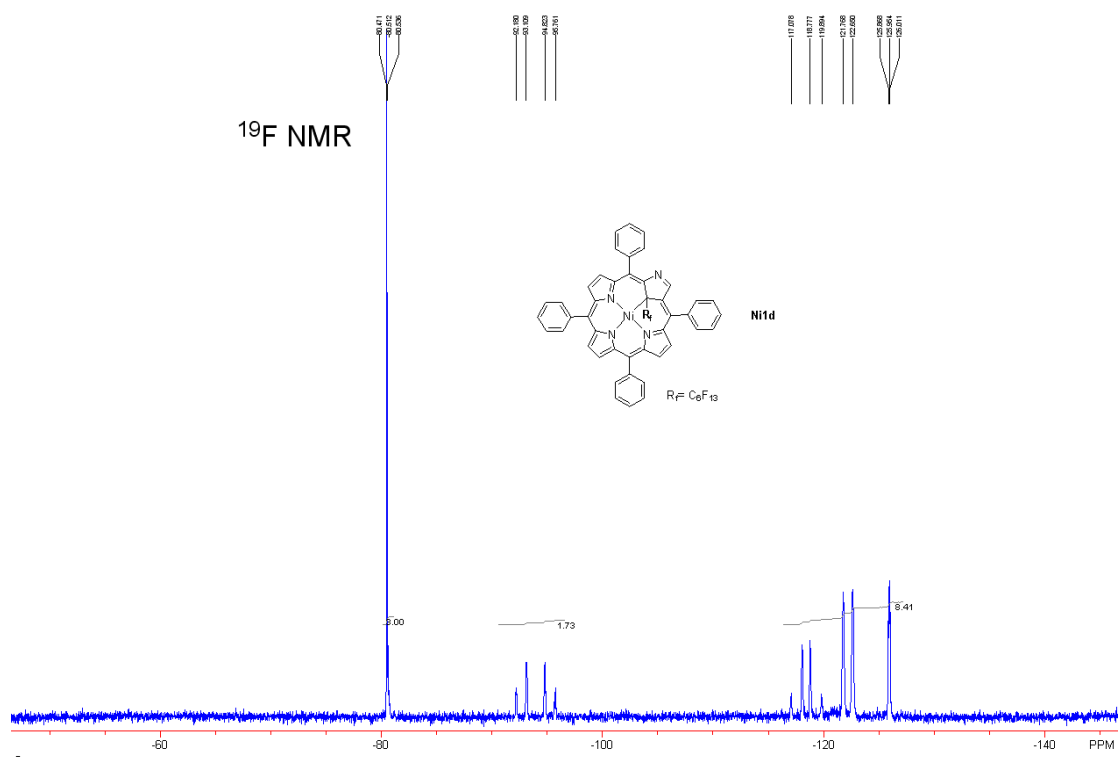

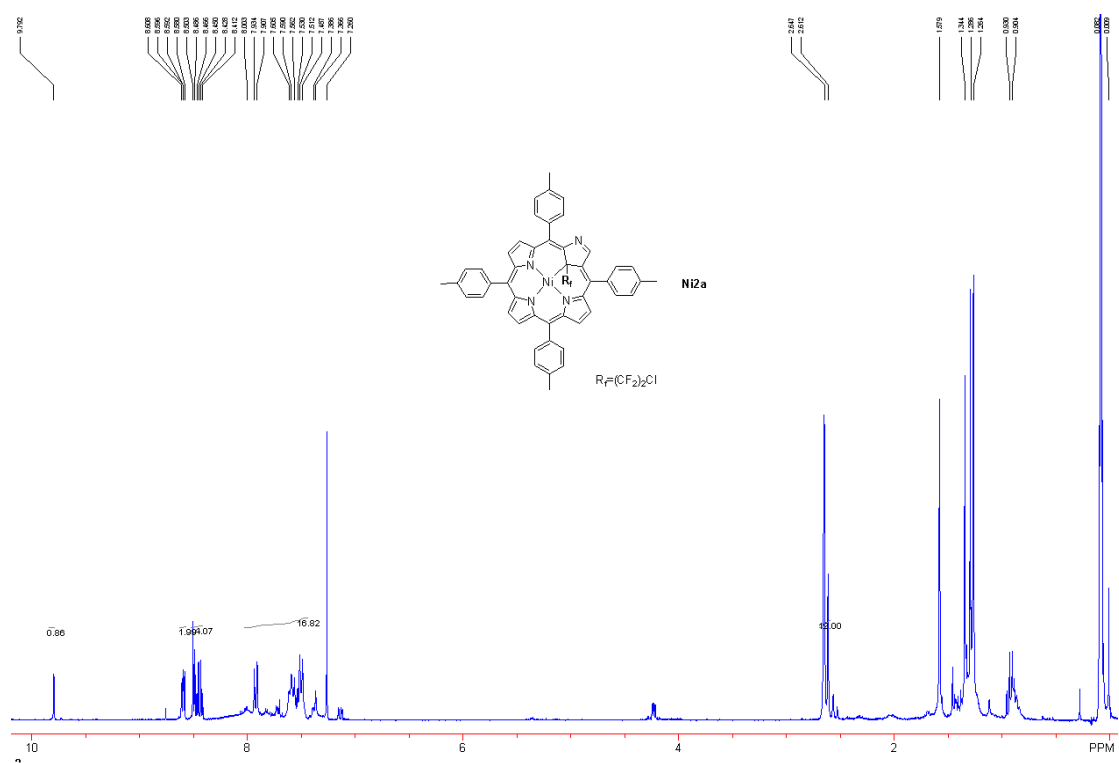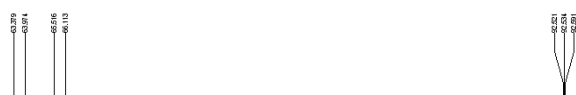

**<sup>19</sup>F NMR**

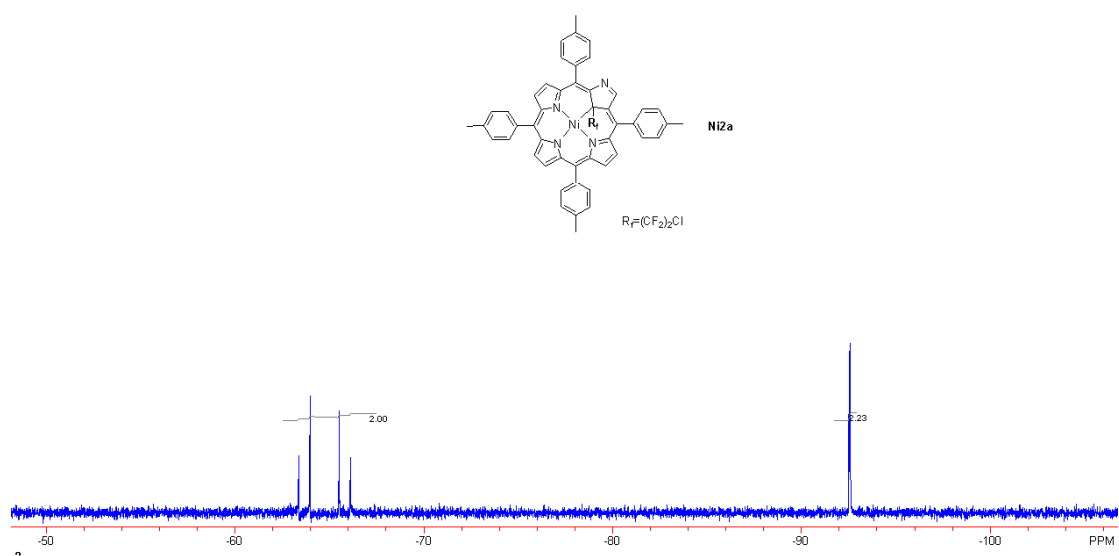

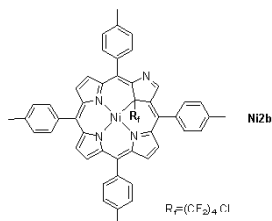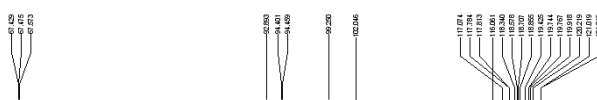

**NiZb**

$R_f = (CF_2)_4 Cl$

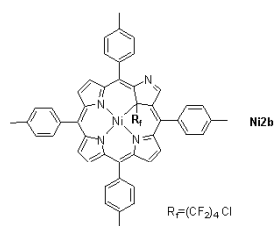

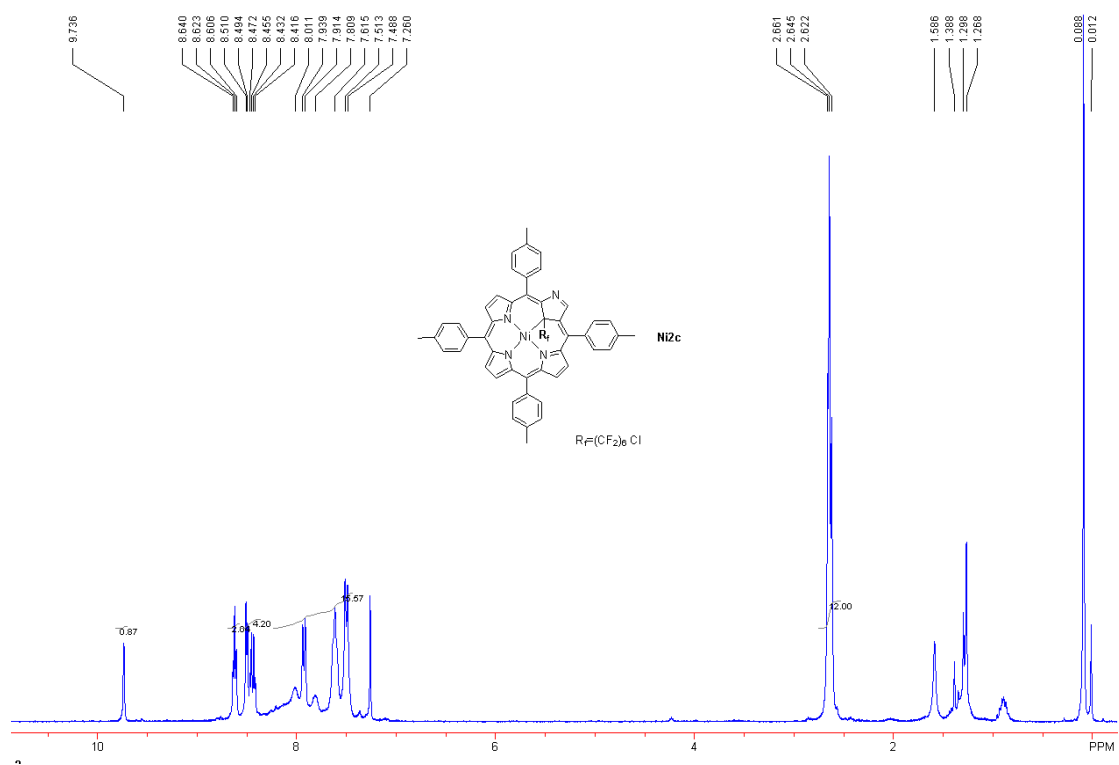

# **<sup>19</sup>F NMR**

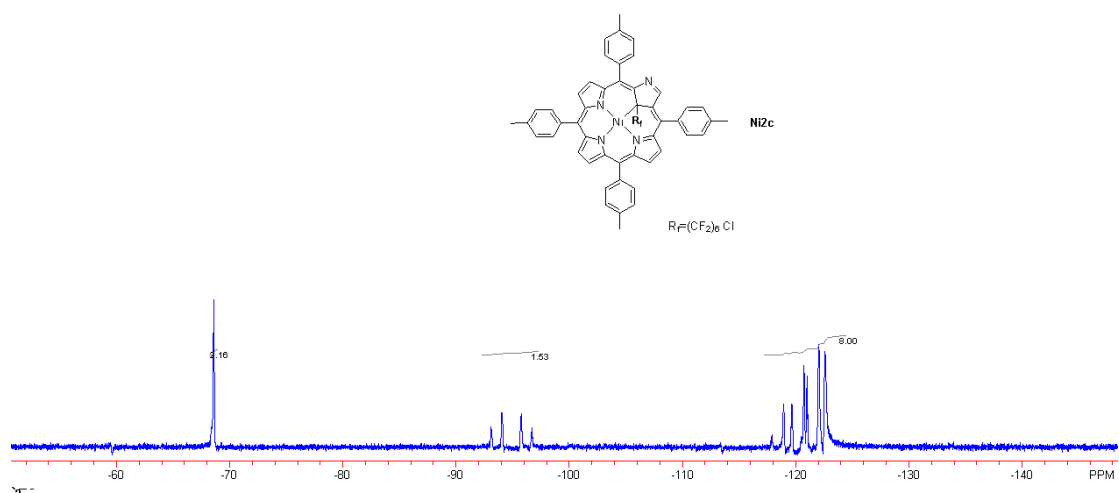



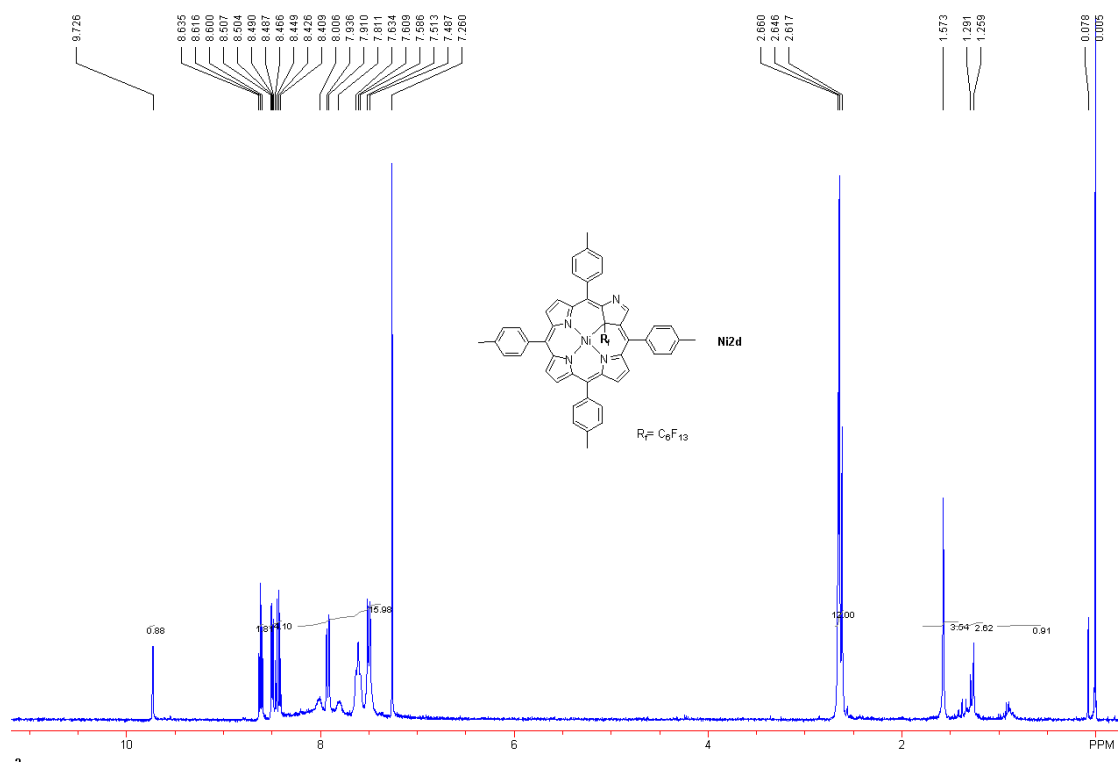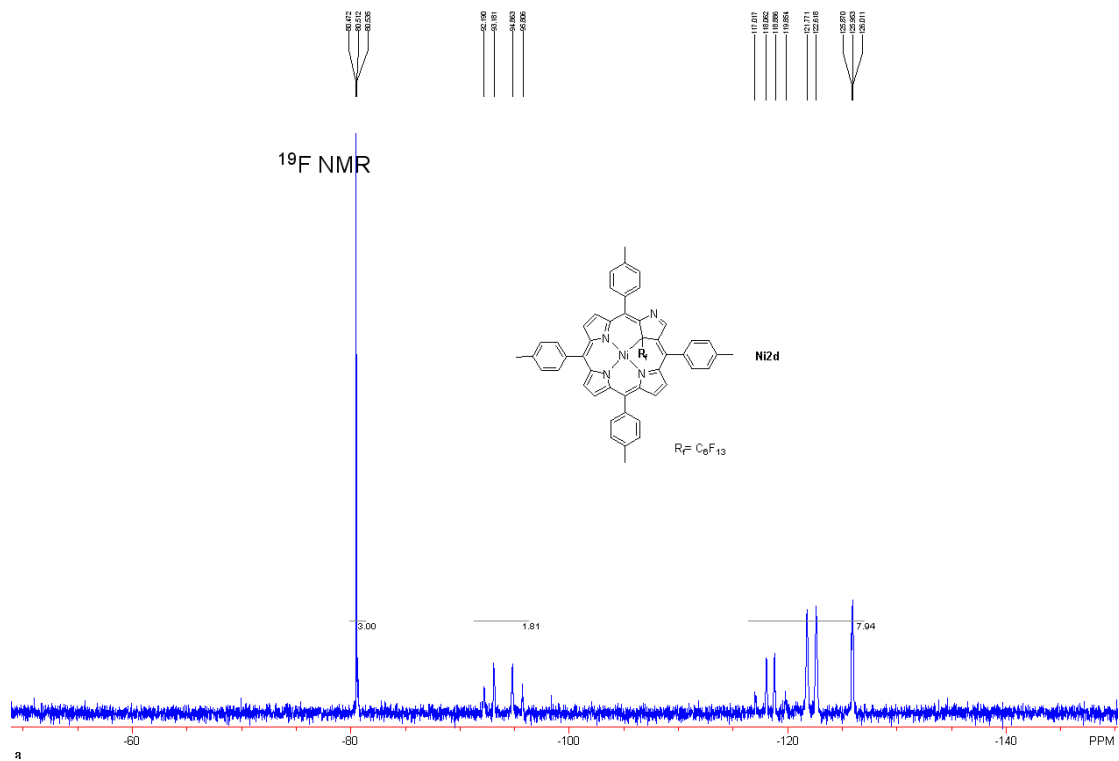

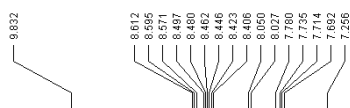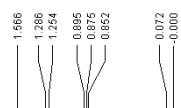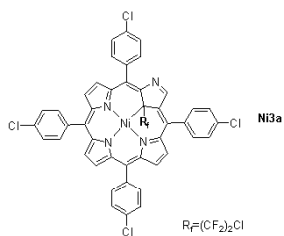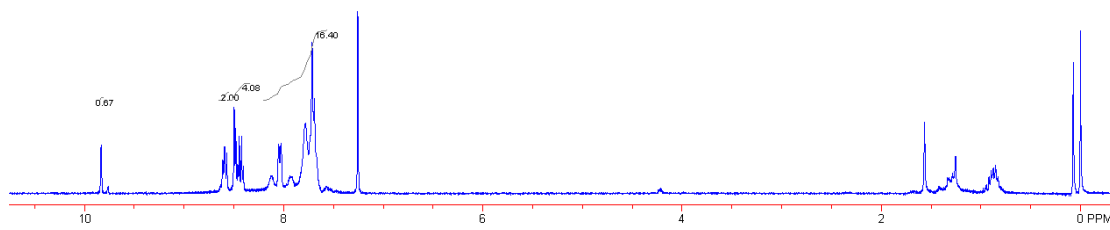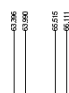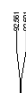

<sup>19</sup>F NMR

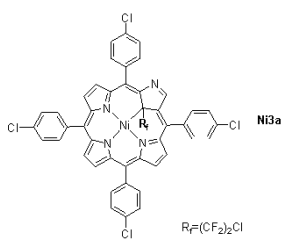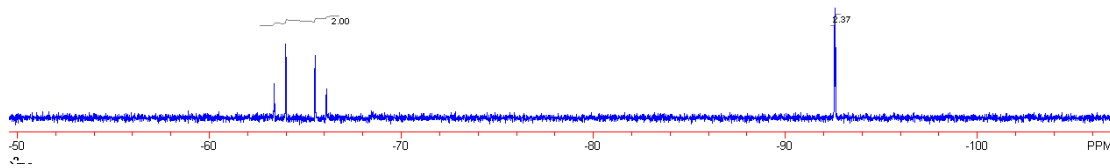

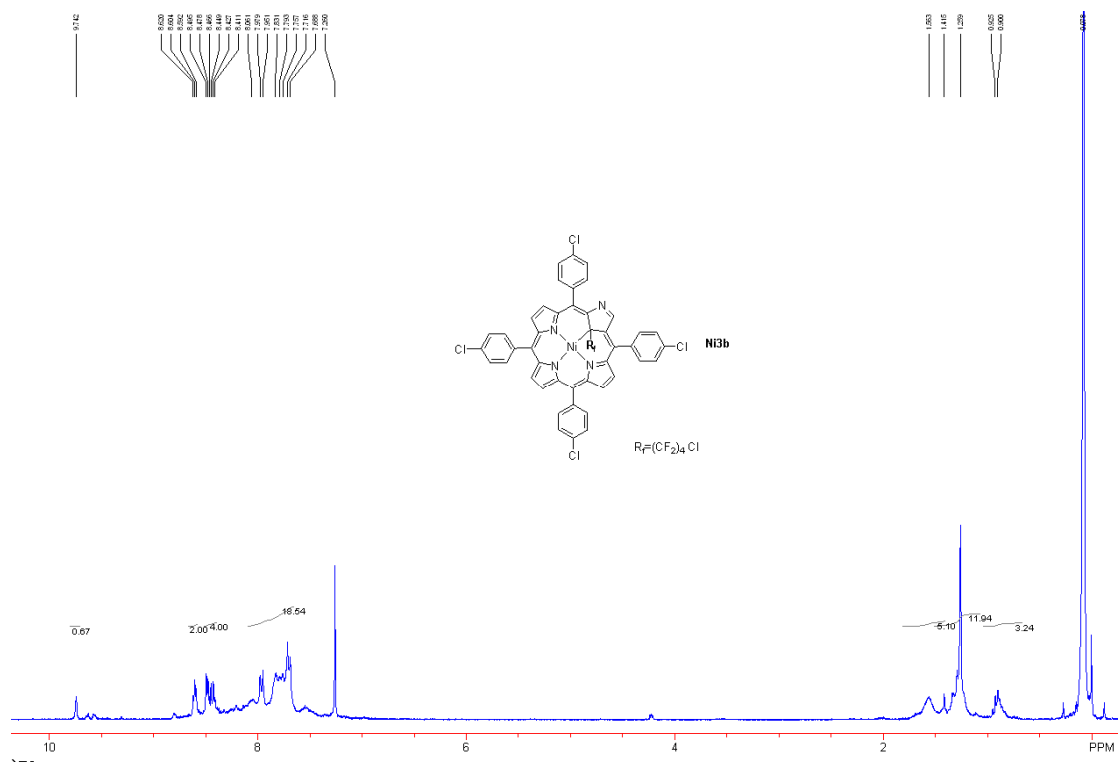

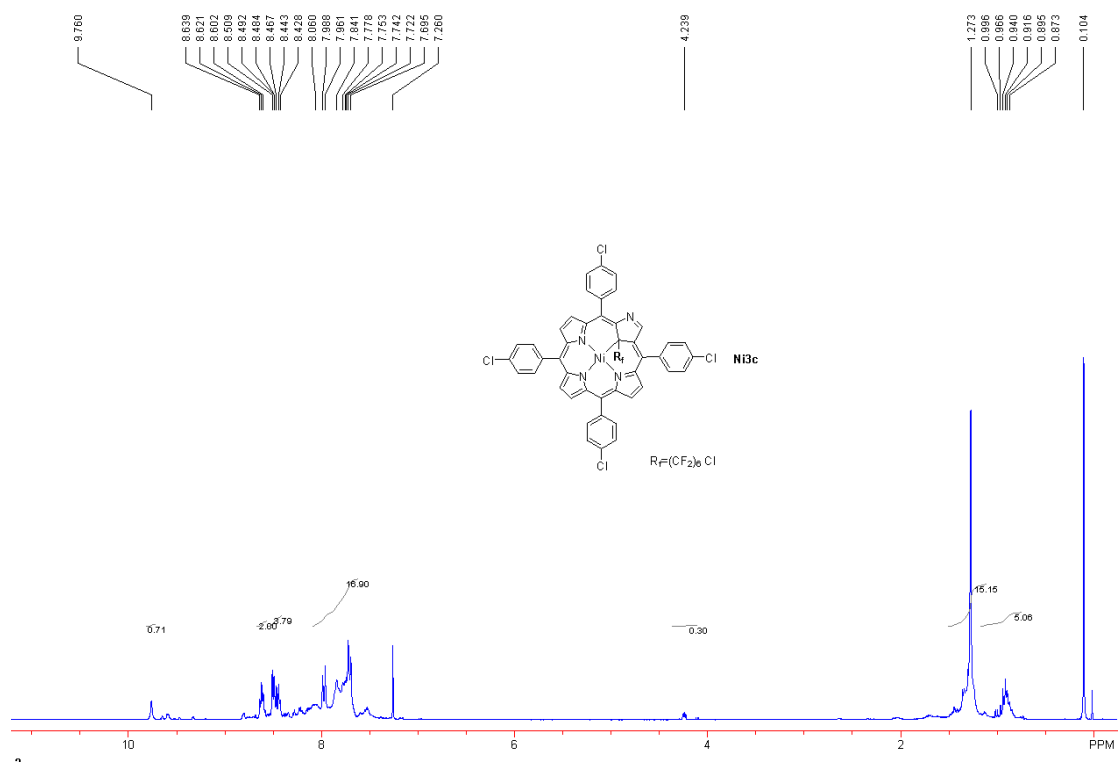

### <sup>19</sup>F NMR

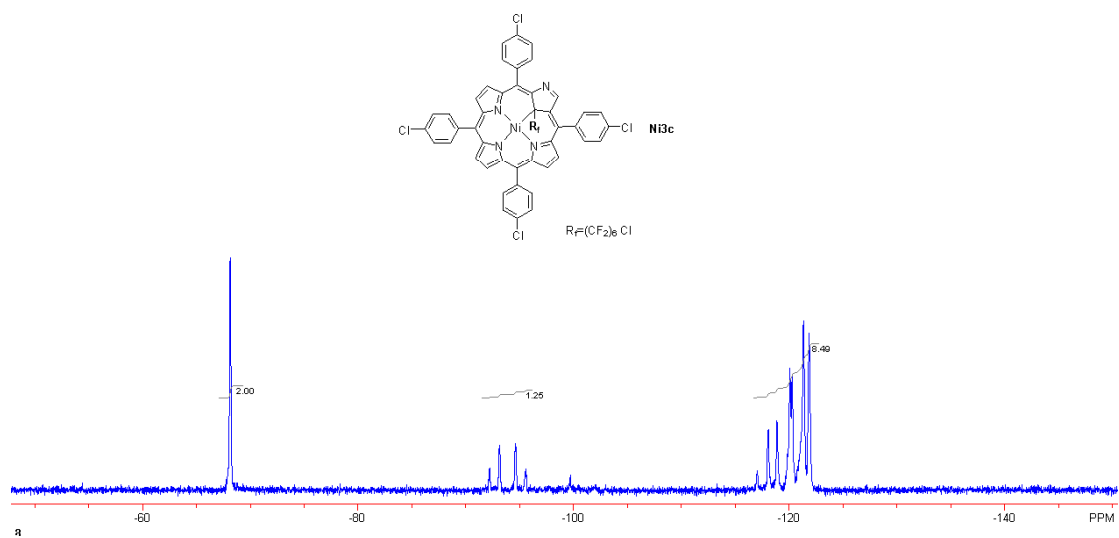

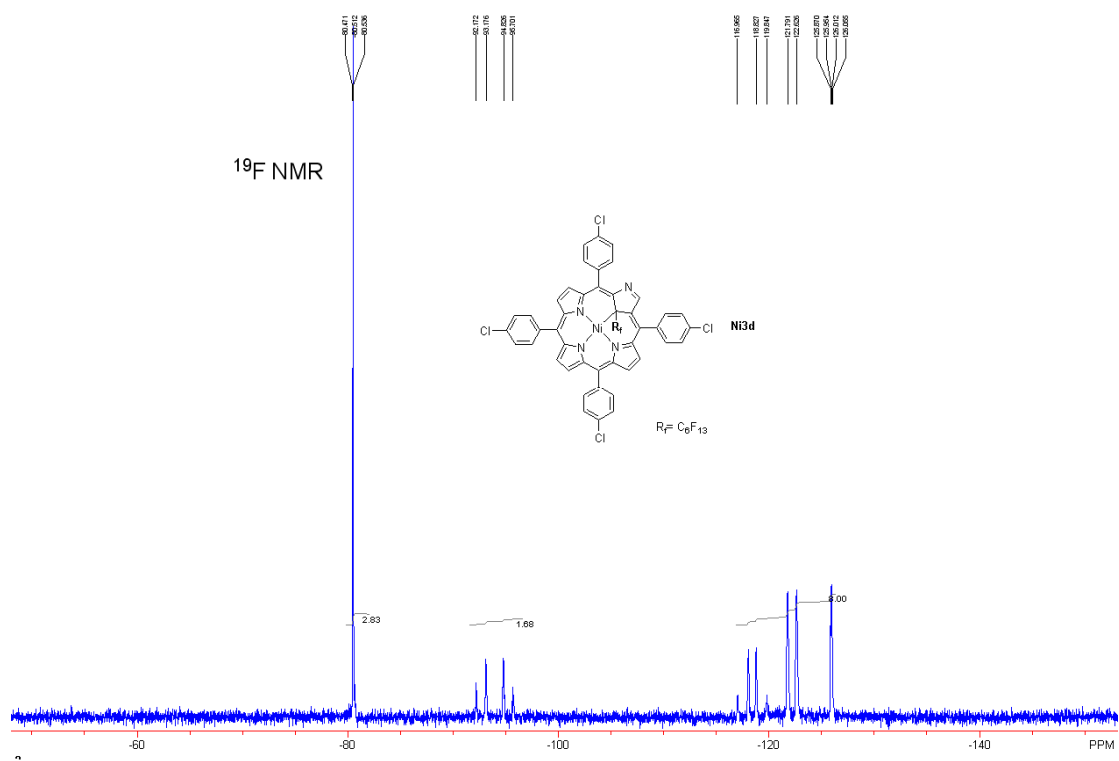

Supplement: b811831k.pdf [file b811831k.pdf]
